# Supplementary material for: Visible light photocatalytic mineralization of 17α-ethinyl estradiol (EE2) and hydrogen evolution over silver and strontium modified TiO2 nanoparticles: mechanisms and phytotoxicity assessment
Source: Royal Society of Chemistry journal article supplement (doi:10.1039/c7ra12638g), 2018-01-01

**Fig. S1** .Emission spectrum of the visible light source provided by the supplier (OSRAMHCI-T 150 W/942 NDL PB)

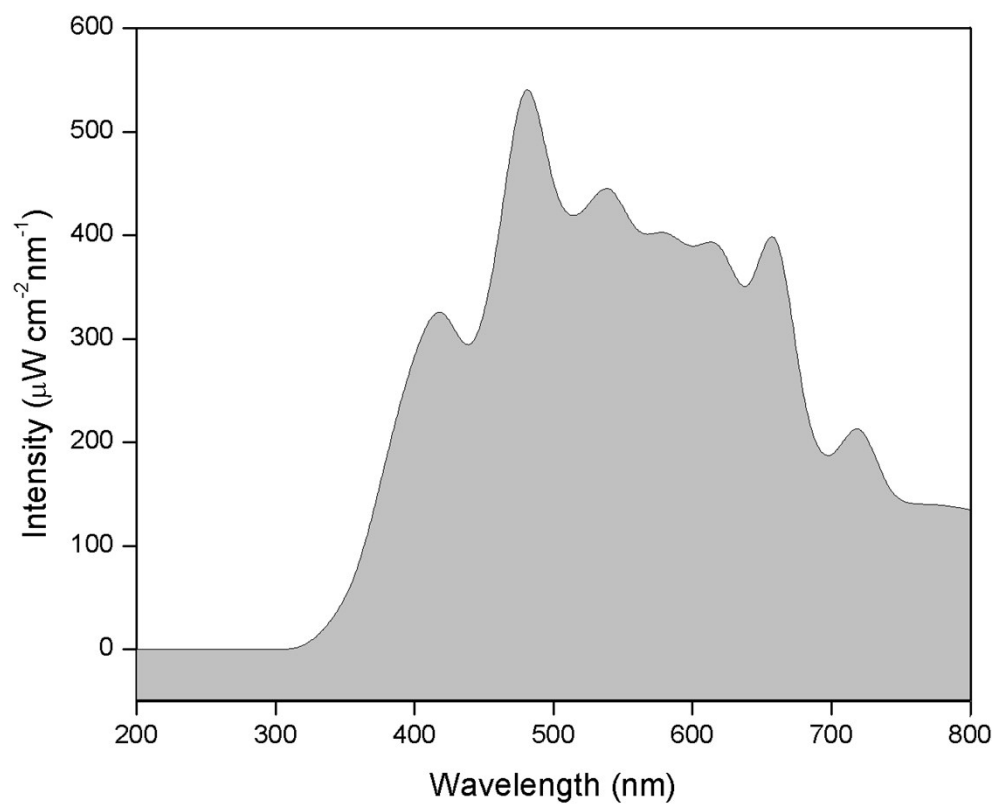

**Fig. S2** HPLC chromatogram of EE2 at 0 h (a) and degraded metabolites extracted at 6 h (b)

**(a)**

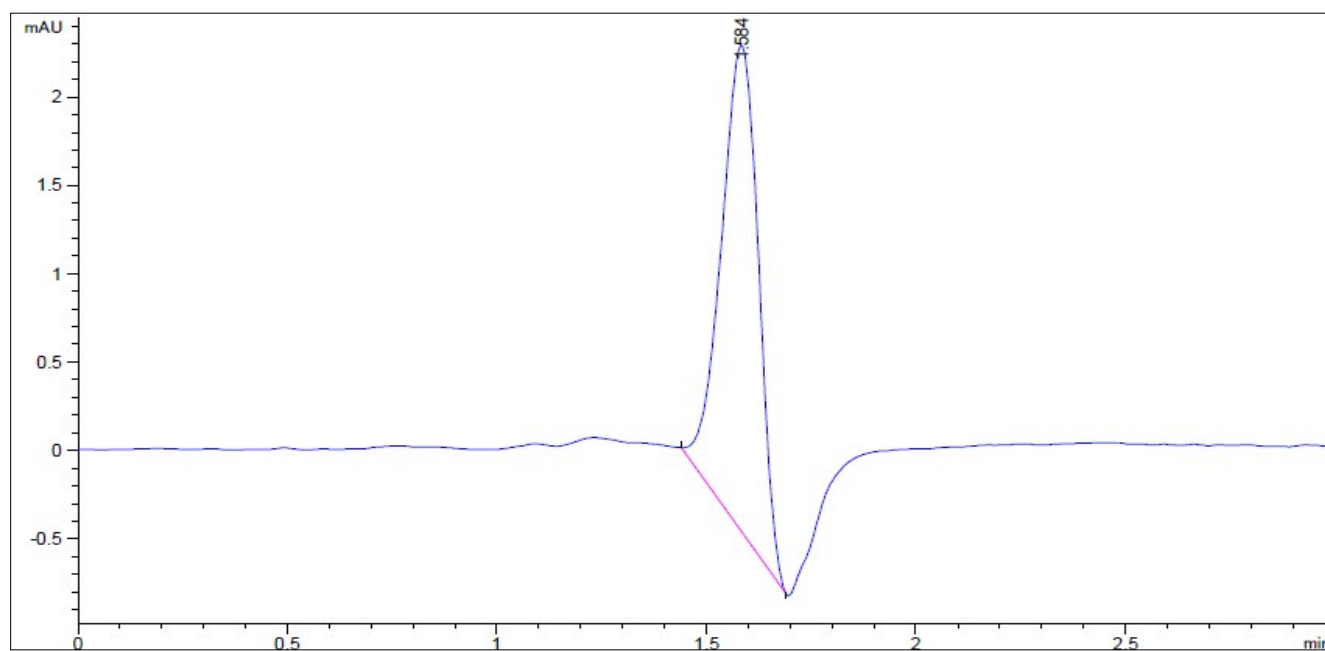

**(b)**

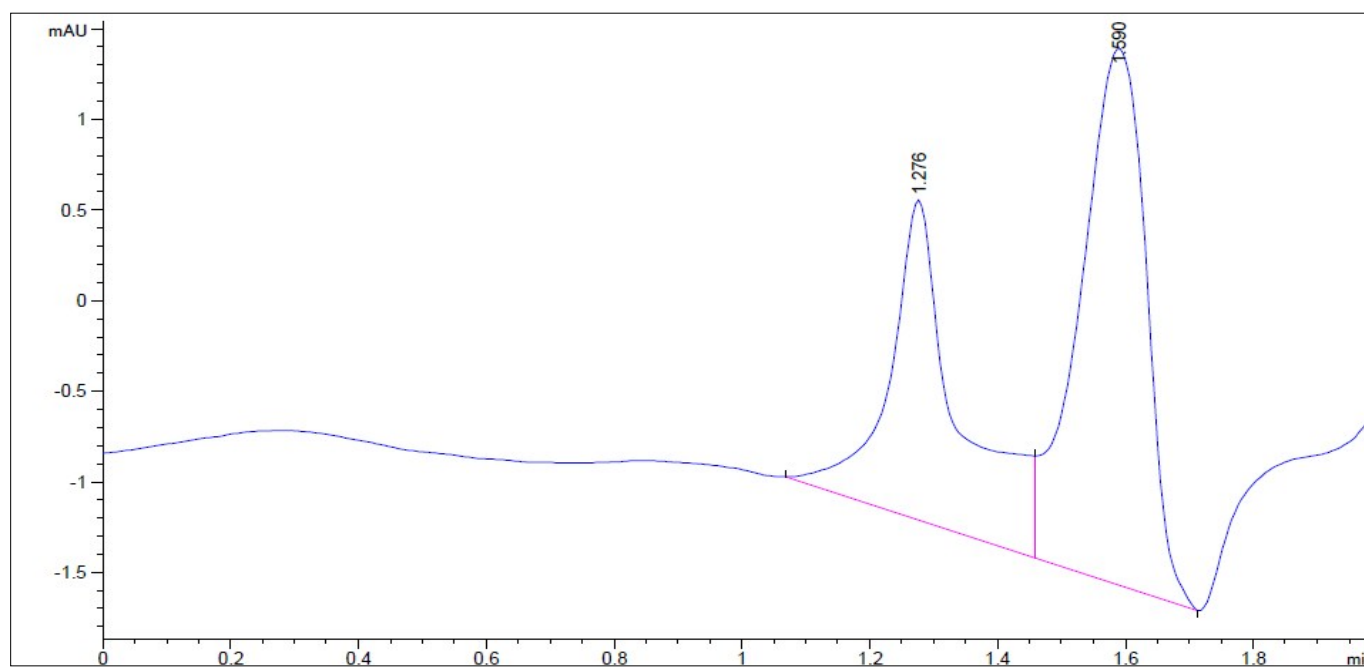

**Fig. S3** LCMS fragmentation pattern of EE2 degraded metabolites extracted at 3 h (a) & 6 h (b)

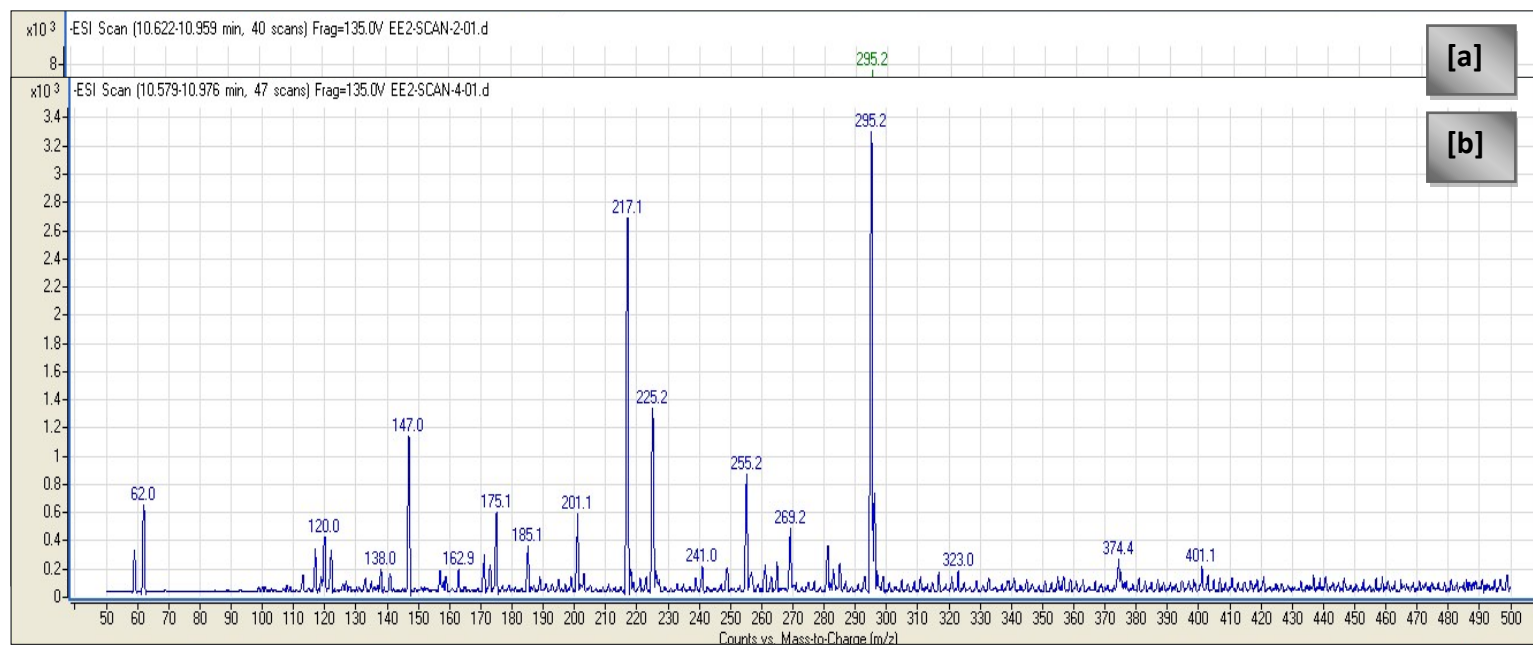

**Fig. S4** Recycle photocatalytic degradation performance of Sr/Ag-TiO<sub>2</sub> for EE2

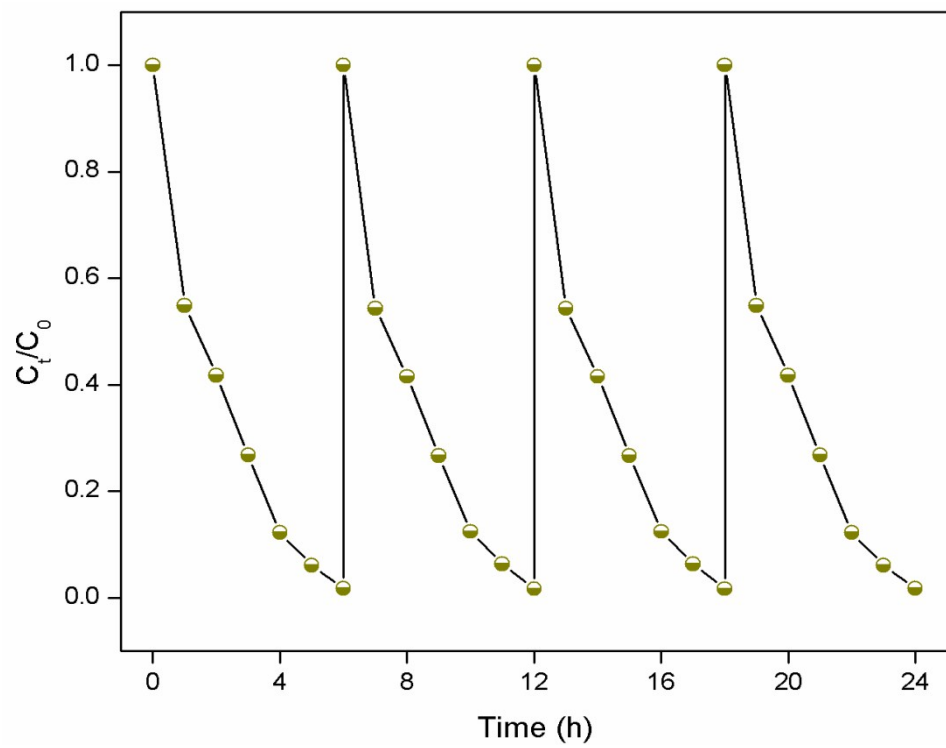

Supplement: c7ra12638g1.pdf [file c7ra12638g1.pdf]
